# Supplementary material
Source: PubMed Central journal article supplement (PMC7936948)
Supplement: NIHMS1645487-supplement-Supplementary___Appendix__online_only_material__etc__.pdf [file NIHMS1645487-supplement-Supplementary___Appendix__online_only_material__etc__.pdf]

|                               | Patient 1                                 | Patient 2                                                      | Patient 3                                             | Patient 4                                | Patient 5                                | Patient 6        | Patient 7                       | Patient 8                                                            | Patient 9   | Patient 10                             | Patient 11                                            | Patient 12     |
|-------------------------------|-------------------------------------------|----------------------------------------------------------------|-------------------------------------------------------|------------------------------------------|------------------------------------------|------------------|---------------------------------|----------------------------------------------------------------------|-------------|----------------------------------------|-------------------------------------------------------|----------------|
| <b>Age (years)</b>            | 1yr, 4mo                                  | 19                                                             | 23                                                    | 34                                       | 50                                       | 50               | 58                              | 58                                                                   | 58          | 60                                     | 61                                                    | 67             |
| <b>Sex</b>                    | Male                                      | Female                                                         | Male                                                  | Female                                   | Male                                     | Female           | Female                          | Female                                                               | Male        | Male                                   | Female                                                | Male           |
| <b>Race</b>                   | Unknown                                   | White                                                          | Unknown                                               | Unknown                                  | White                                    | Unknown          | Unknown                         | White                                                                | Unknown     | White                                  | White                                                 | Unknown        |
| <b>Ethnicity</b>              | Unknown                                   | Hispanic or Latino or Spanish origin                           | Hispanic or Latino or Spanish origin                  | Unknown                                  | Unknown                                  | Unknown          | Unknown                         | Unknown                                                              | Unknown     | Unknown                                | Unknown                                               | Unknown        |
| <b>Home status</b>            | Home                                      | Home                                                           | Home                                                  | Home                                     | Home                                     | Group home       | Nursing home                    | Assisted living facility                                             | Home        | Group home                             | Group home                                            | Group home     |
| <b>Comorbidities</b>          | Acute myeloid leukemia (on chemo-therapy) | Asthma, Type 2 diabetes mellitus, Hypothyroidism (Hashimoto's) | Heart failure with reduced ejection fraction (EF=50%) | Type 2 diabetes mellitus, Hypothyroidism | Type 2 diabetes mellitus, Hypothyroidism | Seizure disorder | Dementia                        | Type 2 diabetes mellitus, Dementia, Hypothyroidism, Seizure disorder | Prediabetes | Type 2 diabetes mellitus, Hypertension | Alzheimer's disease, Hypothyroidism, Seizure disorder | Hypothyroidism |
| <b>BMI (kg/m<sup>2</sup>)</b> | 16.0                                      | 42.5                                                           | 22.1                                                  | 36.7                                     | 27.2                                     | 32.0             | 27.4                            | 29.2                                                                 | 26.1        | 31.0                                   | 28.1                                                  | 30.5           |
| <b>HbA1c (%)<sup>a</sup></b>  | N/A                                       | 7.6                                                            | N/A                                                   | 9.9                                      | 7.4                                      | N/A              | N/A                             | 4.6                                                                  | 5.8         | 7.1                                    | N/A                                                   | N/A            |
| <b>ARDS</b>                   | No                                        | Yes                                                            | No                                                    | Yes                                      | No                                       | No               | Yes                             | Yes                                                                  | No          | No                                     | No                                                    | Yes            |
| <b>Sepsis</b>                 | Yes                                       | Yes                                                            | Yes                                                   | Yes                                      | Yes                                      | No               | Yes                             | Yes                                                                  | No          | Yes                                    | Yes                                                   | Yes            |
| <b>Mechanical ventilation</b> | No                                        | Yes                                                            | No                                                    | Yes                                      | No                                       | No               | No (DNI per MOLST) <sup>b</sup> | Yes                                                                  | No          | No                                     | Yes                                                   | Yes            |
| <b>ICU care</b>               | Yes                                       | Yes                                                            | No                                                    | Yes                                      | No                                       | No               | No                              | Yes                                                                  | No          | No                                     | Yes                                                   | Yes            |
| <b>Length of stay (days)</b>  | 16.8                                      | 17.4                                                           | 1.8                                                   | 27.1                                     | 14.8                                     | 11.9             | 3.5                             | 14.4                                                                 | 19.6        | 3.9                                    | 35.2                                                  | 18.2           |
| <b>Outcome</b>                | Discharged                                | Still admitted                                                 | Discharged                                            | Still admitted                           | Discharged                               | Discharged       | Deceased                        | Deceased                                                             | Discharged  | Discharged                             | Deceased                                              | Still admitted |

<sup>a</sup>Hemoglobin A1c recorded within one month of current admission (except for Patient 8, for which latest recorded HbA1c was 4/23/2018); <sup>b</sup>Do not intubate (DNI) per Medical Orders for Life-Sustaining Treatment (MOLST)

**Supplemental Table 1. Demographics and clinical features of patients with DS admitted with COVID-19.**

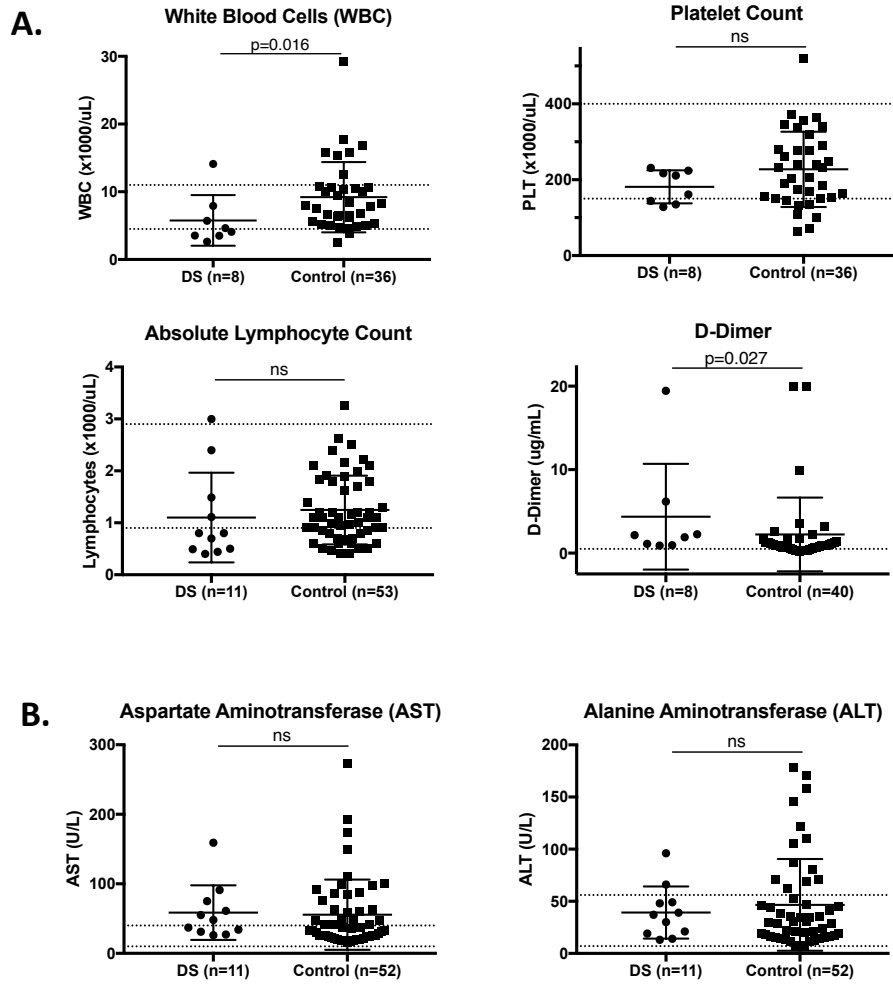

**Supplemental Figure 1. A.** Blood leukocyte count, platelet count, and D-dimer concentration, and **B.** AST, and ALT concentrations of patients with DS and controls hospitalized for COVID-19. Dotted lines represent normal ranges.
